# Supplementary material
Source: Research Square preprint supplement (doi:10.21203/rs.3.rs-10116239/v1)
Supplement: Supplementary file 1 [file f747ba33ab1069748ade792e.docx]

| Table 1. Demographic Characteristics of the Participants (N = 401): n (%) | | |
| --- | --- | --- |
| Variable | Category | n (%) |
|  | Age |  |
| < 20 years | 19 | (4.7) |
| 20–35 years | 246 | (61.3) |
| > 35 years | 136 | (33.9) |
|  | Marital Status |  |
| Currently married | 375 | (93.5) |
| Previously married | 26 | (6.5) |
|  | Duration of Marriage |  |
| < 1 year | 11 | (2.7) |
| 1–3 years | 88 | (21.9) |
| 4–6 years | 107 | (26.7) |
| > 6 years | 195 | (48.6) |
|  | Educational Level |  |
| Primary education | 96 | (23.9) |
| Secondary education | 142 | (35.4) |
| University education | 126 | (31.4) |
| Postgraduate studies | 37 | (9.2) |
|  | Current Employment Status |  |
| Housewife (unemployed) | 247 | (61.6) |
| Employed in a non health sector | 128 | (31.9) |
| Employed in the healthcare sector | 26 | (6.5) |

| Table 2. Height, Weight, and Body Mass Index (BMI) Characteristics (N = 401): n (%) | |
| --- | --- |
| Variable Category | n (%) |
| Height (cm) | |
| < 150 | 22 (5.5) |
| 150–159 | 167 (41.6) |
| 160–169 | 183 (45.6) |
| ≥ 170 | 29 (7.2) |
| Weight (kg) | |
| < 50 | 12 (3.0) |
| 50–59 | 38 (9.5) |
| 60–69 | 71 (17.7) |
| 70–79 | 107 (26.7) |
| 80–89 | 121 (30.2) |
| ≥ 90 | 52 (13.0) |
| Body Mass Index (BMI) | |
| Underweight | 9 (2.2) |
| Normal weight | 79 (19.7) |
| Overweight | 90 (22.4) |
| Obese | 223 (55.6) |

| Table 3. Health Habits and Medical Conditions (N = 401): n (%) | | |
| --- | --- | --- |
| Variable Category | n (%) |
| Regular Exercise | |
| Yes | 177 (44.1) |
| No | 224 (55.6) |
| Smoking (Active or Passive) | |
| Yes | 203 (50.6) |
| No | 198 (49.4) |
| Frequency of Physical Activity per Week | |
| None | 206 (51.4) |
| 1–2 times | 131 (32.7) |
| 3–4 times | 41 (10.2) |
| >4 times | 23 (5.7) |
| Hypertension | |
| Yes | 40 (10.0) |
| No | 361 (90.0) |
| Diabetes Mellitus | |
| Yes | 47 (11.7) |
| No | 354 (88.3) |
| Thyroid Disorders | |
| Yes | 54 (13.5) |
| No | 347 (86.5) |
| Asthma | |
| Yes | 5 (1.2) |
| No | 396 (98.8) |
| Autoimmune Diseases | |
| Yes | 6 (1.5) |
| No | 395 (98.5) |
| Gynecological Disorders | |
| Yes | 7 (1.7) |
| No | 394 (98.3) |
| Polycystic Ovary Syndrome (PCOS) | |
| Yes | 101 (25.2) |
| No | 300 (74.8) |
| Migraine | |
| Yes | 10 (2.5) |
| No | 391 (97.5) |
| Other Diseases | |
| Yes | 14 (3.5) |
| No | 387 (96.5) |

| Table 4. Pregnancy Related Characteristics (N = 401): n (%) | | |
| --- | --- | --- |
| Variable Category | n (%) |
| Menstrual Cycle Pattern | |
| Regular | 235 (58.6) |
| Irregular | 146 (36.4) |
| Intermittent | 20 (5.0) |
| Number of Previous Pregnancies | |
| Never pregnant | 82 (20.4) |
| One pregnancy | 112 (27.9) |
| Two pregnancies | 94 (23.4) |
| Three or more pregnancies | 113 (28.2) |
| Are You Currently Trying to Conceive? | |
| Yes | 186 (46.4) |
| No | 215 (53.6) |
| Has Your Attempt to Conceive Continued for More Than One Year Without Success? | |
| Yes | 210 (52.4) |
| No | 191 (47.6) |
| Have You Consulted a Physician Because of Delayed Conception? | |
| Yes | 224 (55.9) |
| No | 177 (44.1) |
| Has a Physician Informed You That Excess Weight or Obesity May Be a Cause or Contributing Factor to Difficulty Conceiving? | |
| Yes | 172 (42.9) |
| No | 155 (38.7) |
| No medical consultation | 74 (18.5) |

| Table 5. Relationship between menstrual cycle regularity and body mass index (N = 401): N (%) | | | | | |
| --- | --- | --- | --- | --- | --- |
| BMI Category | Regular | Irregular | Intermittent | χ² | P-value |
| Underweight | 6 (66.7) | 3 (33.3) | 0 | 31 | <0.001 |
| Normal weight | 61 (77.2) | 16 (20.3) | 2 (2.5) |
| Overweight | 64 (71.1) | 22 (24.4) | 4 (4.4) |
| Obesity | 104 (46.4) | 105 (47.1) | 14 (6.3) |

| Table 6. Relationship between number of previous pregnancies and BMI (N = 401): N (%) | | | | | | | |
| --- | --- | --- | --- | --- | --- | --- | --- |
| BMI Category | No pregnancy | 1 pregnancy | 2 pregnancies | ≥3 pregnancies | χ² | P-value |
| Underweight | 5 (55.6) | 2 (22.2) | 1 (11.1) | 1 (11.1) | 29.4 | 0.001 |
| Normal weight | 18 (22.8) | 18 (22.8) | 22 (27.8) | 21 (26.6) |
| Overweight | 10 (11.1) | 18 (20.0) | 21 (23.3) | 41 (45.6) |
| Obesity | 49 (22.0) | 74 (33.2) | 50 (22.4) | 50 (22.4) |

| Table 7. Relationship between pregnancy success and BMI (N = 401): N (%) | | | | |
| --- | --- | --- | --- | --- |
| BMI Category | Failure to conceive within one year | | χ² | P-value |
|  | Yes | No | 39.8 | <0.001 |
| Underweight | 4 (44.4) | 5 (55.6) |
| Normal weight | 28 (35.4) | 51 (64.6) |
| Overweight | 30 (33.3) | 60 (66.7) |
| Obesity | 148 (66.4) | 75 (33.6) |

| Table 8. Relationship between smoking and difficulty conceiving (>1 year) according to overweight and obesity categories (N = 313): N (%) | | | | | | |
| --- | --- | --- | --- | --- | --- | --- |
| BMI Category | Failure to conceive >1 year | Smoking (-) | Smoking (+) | OR | χ² | P-value |
| **Overweight** |  |  |  | 2.14 | 2.7 | 0.100 |
| No | 31 (51.7) | 29 (48.3) |
| Yes | 10 (33.3) | 20 (66.7) |
| **Obesity** |  |  |  | 1.59 | 2.6 | 0.104 |
| No | 39 (52.0) | 36 (48.0) |
| Yes | 60 (40.5) | 88 (59.5) |
| **Total (Overweight + Obesity)** |  |  |  | 1.66 | 4.87 | 0.027 |
| No | 70 (51.9) | 65 (48.1) |
| Yes | 70 (39.3) | 108 (60.7) |

| Table 9. Association Between Polycystic Ovary Syndrome (PCOS) and Difficulty Conceiving (>1 Year) According to Overweight and Obesity Categories (N = 313): n (%) | | | | | | | |
| --- | --- | --- | --- | --- | --- | --- | --- |
| BMI Category | Pregnancy Failure >1 Year | PCOS (+) n (%) | PCOS (−) n (%) | OR | χ² | P value |
| Overweight | No | 9 (15.0) | 51 (85.0) | 2.43 | 2.80 | 0.094 |
| Yes | 9 (30.0) | 21 (70.0) |
| Obesity | No | 14 (18.7) | 61 (81.3) | 2.43 | 6.96 | 0.008 |
| Yes | 53 (35.8) | 95 (64.2) |
| Overall (Overweight + Obesity) | No | 23 (17.0) | 112 (83.0) | 2.60 | 12.20 | <0.001 |
| Yes | 62 (34.8) | 116 (65.2) |

| Table 10. Association Between Diabetes Mellitus and Difficulty Conceiving (>1 Year) According to Overweight and Obesity Categories (N = 313): n (%) | | | | | | |
| --- | --- | --- | --- | --- | --- | --- |
| BMI Category | Pregnancy Failure >1 Year | Diabetes (+) n (%) | Diabetes (−) n (%) | χ² | P value |
| Overweight | No | 3 (5.0) | 57 (95.0) | 0.80 | 0.370 |
| Yes | 3 (10.0) | 27 (90.0) |
| Obesity | No | 9 (12.0) | 66 (88.0) | 2.031 | 0.154 |
| Yes | 29 (19.6) | 119 (80.4) |
| Overall (Overweight + Obesity) | No | 12 (8.9) | 123 (91.1) | 5.249 | 0.022 |
| Yes | 32 (18.0) | 146 (82.0) |  |  |
